# Supplementary material for: Pistacia lentiscus Hydrosol: Untargeted Metabolomic Analysis and Anti-Inflammatory Activity Mediated by NF-κB and the Citrate Pathway
Source: PubMed Central journal article supplement (PMC7652607; doi:10.1155/2020/4264815), 2020-11-01
Supplement: 4264815.f1.pdf [file 4264815.f1.pdf]

## Supplementary Figures

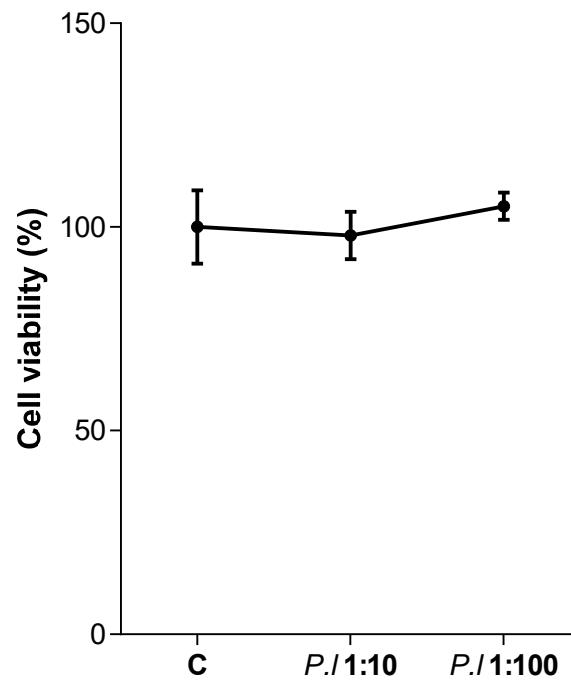

**Figure S1. Effect of *P. lentiscus* hydrosol on primary human monocytes cell viability.** Primary human CD14<sup>+</sup> monocytes were treated with *P.l* 1:10 and *P.l* 1:100. After 72 hours cell viability was assessed by MTT assay. Means  $\pm$  S.D. of three replicate independent experiments are shown. Differences between treated and untreated cells (C, set at 100%) were not significant (*one-way ANOVA*).

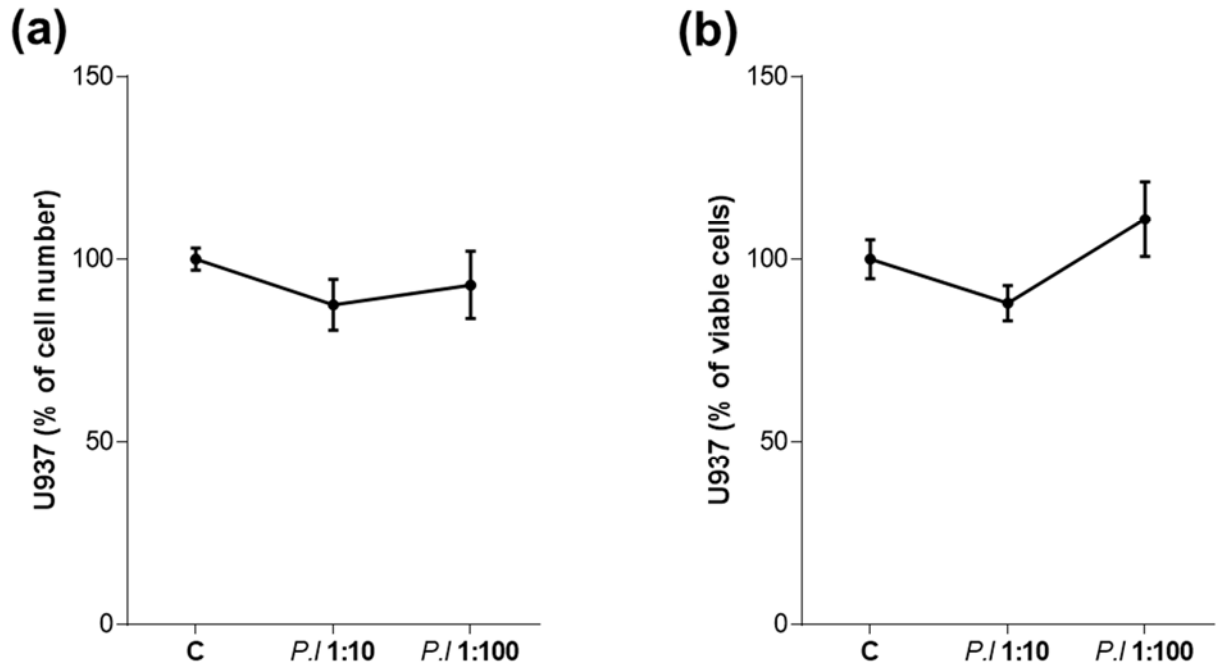

**Figure S2. Effect of *P. lentiscus* hydrosol on U937 cell viability.** U937 cells were treated with *P.I* 1:10 and *P.I* 1:100. After 72 hours cell viability was assessed by cell counting (a) and MTT assay (b). Means  $\pm$  S.D. of three replicate independent experiments are shown. Differences between treated and untreated cells (C, set at 100%) were not significant (*one-way ANOVA*).
